# Supplementary material for: Association mapping reveals gene action and interactions in the determination of flowering time in barley
Source: Springer Nature journal article supplement (doi:10.1007/s00122-008-0896-y), 2008-10-01
Supplement: MOESM4 [file 122_2008_896_MOESM4_ESM.doc]

Table S2. SSR markers used for genotypic analysis.

| SSR | Position§ | Primer Pool# |
| --- | --- | --- |
| GBM 1007 | 1H | PP03 |
| GBM 1029 | 1H | PP04 |
| GBM 1002 | 1H | PP05 |
| GBM 1461 | 1H | PP03 |
| GBM 1035 | 2H | PP02 |
| GBM 1218 | 2H | PP01 |
| GBM 1047 | 2H | PP01 |
| GBM 1036 | 2H | PP05 |
| GBM 1280 | 3H | PP03 |
| GBM 1031 | 3H | PP04 |
| GBM 1043 | 3H | PP02 |
| GBM 1020 | 4H | PP01 |
| GBM 1003 | 4H | PP02 |
| GBM 1015 | 4H | PP04 |
| GBM 1176 | 5H | PP04 |
| GBM 1026 | 5H | PP04 |
| GBM 1054 | 5H | PP01 |
| GBM 1064 | 5H | PP02 |
| GBM 1021 | 6H | PP04 |
| GBM 1075 | 6H | PP02 |
| GBM 1404 | 6H | PP03 |
| GBM 1060 | 7H | PP02 |
| GBM 1464 | 7H | PP05 |
| GBM 1516 | 7H | PP01 |
| GBM 1419 | 7H | PP01 |

§ chromosomal position according to Thiel *et al*. (2003)

# SSR markers that were amplified in the same multiplex assay
